# Supplementary material for: Transient perivascular inflammation of the carotid artery (TIPIC) syndrome
Source: Atypon-hosted journal article supplement (doi:10.1024/0301-1526/a000989), 2022-02-08
Supplement: 0301-1526_a000989_esm1.pdf [file 0301-1526_a000989_esm1.pdf]

## Electronic supplementary material

### ESM 1. Characteristics of patients with and without recurrence

|                                             | With TIPIIC recurrence                                                                               | Without TIPIIC recurrence                                                                                  |
|---------------------------------------------|------------------------------------------------------------------------------------------------------|------------------------------------------------------------------------------------------------------------|
| <b>Baseline and clinical presentation</b>   |                                                                                                      |                                                                                                            |
| Men, n/N (%)                                | 4/13 (30.8)                                                                                          | 26/59 (44.1)                                                                                               |
| Age (years), mean (SD)                      | 45.5 (9.8)                                                                                           | 48.5 (11.7)                                                                                                |
| Arterial hypertension, n (%)                | 1/13 (7.7)                                                                                           | 9/58 (15.5)                                                                                                |
| Active smoking, n (%)                       | 5/13 (38.5)                                                                                          | 14/56 (25.0)                                                                                               |
| Diabetes mellitus, n (%)                    | 0/13 (0)                                                                                             | 1/55 (1.8)                                                                                                 |
| Hypercholesterolemia, n (%)                 | 2/13 (15.4)                                                                                          | 6/55 (10.9)                                                                                                |
| Atherothrombotic artery disease, n (%)      | 0/12 (0)                                                                                             | 2/55 (3.6)                                                                                                 |
| Recent viral infection, n (%)               | 1/13 (7.7)                                                                                           | 3/57 (5.3)                                                                                                 |
| Painful palpation/Tenderness, n (%)         | 13/13 (100)                                                                                          | 52/57 (91.2)                                                                                               |
| Pain intensity                              | Mild: 1/11 (9.1)<br>Moderate: 9/11 (81.8)<br>Severe: 1/11 (9.1)                                      | Mild: 14/54 (25.9)<br>Moderate: 35/54 (64.8)<br>Severe: 5/54 (9.3)                                         |
| Local swelling, n (%)                       | 4/13 (30.8)                                                                                          | 16/57 (28.1)                                                                                               |
| Adenomegalies at palpation, n (%)           | 2/13 (16.7)                                                                                          | 8/48 (16.7)                                                                                                |
| Fever, n (%)                                | 1/13 (7.7)                                                                                           | 3/53 (5.7)                                                                                                 |
| Headache, n (%)                             | 0/13 (0)                                                                                             | 8/58 (13.8)                                                                                                |
| Medical therapy, n (%)                      | 10/13 (76.9)                                                                                         | 47/57 (82.5)                                                                                               |
| Type of medical therapy, n (%)              | Aspirin: 2/10 (20.0)<br>NSAR: 7/10 (70.0)<br>Glucocorticoids: 1/10 (10.0)                            | Aspirin: 18/49 (36.7)<br>NSAR: 22/49 (44.9)<br>Glucocorticoids: 9/49 (18.4)                                |
| Pain resolution time (days), median (Q1-Q3) | 12.0 (7.0-15.0)                                                                                      | 14.0 (10.0-15.0)                                                                                           |
| <b>Sonographic data</b>                     |                                                                                                      |                                                                                                            |
| <i>Baseline</i>                             |                                                                                                      |                                                                                                            |
| Localization, n (%)                         | Common carotid artery: 5/7 (71.4)<br>Internal carotid artery: 2/7 (28.6)<br>Carotid bulb: 3/7 (42.9) | Common carotid artery: 17/39 (43.6)<br>Internal carotid artery: 18/39 (46.2)<br>Carotid bulb: 27/39 (69.2) |
| Localization concentric/eccentric, n (%)    | Concentric: 1/5 (20.0)<br>Eccentric: 4/5 (80.0)                                                      | Concentric: 1/29 (3.4)<br>Eccentric: 26/29 (89.7)                                                          |
| Localization wall thickness, n (%)          | Anterior: 6/12 (50.0)<br>Posterior: 6/12 (50.0)                                                      | Anterior: 7/38 (18.4)<br>Posterior: 31/38 (81.6)                                                           |

|                                          |                                                 |                                                 |
|------------------------------------------|-------------------------------------------------|-------------------------------------------------|
|                                          | Lateral: 10/13 (76.9)                           | Lateral: 26/36 (72.2)                           |
|                                          | Medial: 0/13 (0)                                | Medial: 10/36 (27.8)                            |
| Max wall thickness (mm), mean (SD)       | 4.9 (1.4)                                       | 4.9 (2.4)                                       |
| Narrowing of the lumen, n (%)            | 3/5 (60.0)                                      | 11/37 (29.7)                                    |
| Length lesion, mm, mean (SD)             | 11.0 (3.6)                                      | 16.2 (9.5)                                      |
| Soft plaque, n (%)                       | 2/4 (50.0)                                      | 16/24 (66.7)                                    |
| Adenomegalies, n (%)                     | 1/4 (25.0)                                      | 7/28 (25.0)                                     |
| <i>Follow-up</i>                         |                                                 |                                                 |
| Max wall thickness (mm), mean (SD)       | 1.2 (1.1)                                       | 1.9 (1.1)                                       |
| Length lesion (mm), mean (SD)            | 15 (7.1)                                        | 6.3 (3.5)                                       |
| <b>Magnetic resonance imaging data</b>   |                                                 |                                                 |
| <i>Baseline</i>                          |                                                 |                                                 |
| Localization, n (%)                      | Common carotid artery:<br>8/9 (88.9)            | Common carotid artery:<br>37/48 (77.1)          |
|                                          | Internal carotid artery:<br>4/9 (44.4)          | Internal carotid artery: 28/48<br>(58.3)        |
|                                          | Carotid bulb: 8/9 (88.9)                        | Carotid bulb: 39/48 (81.3)                      |
| Localization concentric/eccentric, n (%) | Concentric: 1/9 (11.1)<br>Eccentric: 8/9 (88.9) | Concentric: 1/9 (11.1)<br>Eccentric: 8/9 (88.9) |
| Max wall thickness (mm), mean (SD)       | 6.4 (1.9)                                       | 5.1 (2.2)                                       |
| Length lesion (mm), mean (SD)            | 22.3 (8.1)                                      | 27.7 (14.9)                                     |
| Adenomegalies, n (%)                     | 3/9 (33.3)                                      | 4/36 (11.1)                                     |
| <i>Follow-up</i>                         |                                                 |                                                 |
| Max wall thickness (mm), mean (SD)       | 2.7 (0.6)                                       | 2.9 (1.6)                                       |
| Length lesion (mm), mean (SD)            | 14.3 (6.1)                                      | 15.4 (10.3)                                     |
